# Supplementary material for: Observation of the Long-Period Monotonic Seismic Waves of the November 11, 2018, Mayotte event by the Iranian Broadband Seismic Stations
Source: Research Square preprint supplement (doi:10.21203/rs.3.rs-120308/v1), 2020-12-04
Supplement: Supplementary file 1 [file a6cb0bca692b7b0eab0189e0.docx]

**Appendix**

List of the regular earthquakes whose surface wave magnitudes (*Ms*) were estimated

using equation (1). Data except *Ms* and *mb(conv)* were presented by USGS.

|  | ***Date*** | ***Hypocenter*** | | | | ***Magnitude*** | | |
| --- | --- | --- | --- | --- | --- | --- | --- | --- |
| *Origin Time (UTC)* | *Location* | | | *mb* | *Ms* | *mb(conv)* |
| *No* | *Year-Month-Day* | *Lat.(degree)* | *Lon. (degree)* | *Depth (km)* |
| 1 | 2018-06-01 | 08:28:20 | -12.7835 | 45.7277 | 10 | 4.6 | 3.8 | 4.7 |
| 2 | 2018-06-01 | 05:44:11 | -12.787 | 45.6429 | 10 | 4.8 | 4.5 | 5.1 |
| 3 | 2018-05-31 | 08:43:51 | -12.8613 | 45.6788 | 10 | 4.7 | 3.8 | 4.7 |
| 4 | 2018-05-31 | 01:10:14 | -12.9066 | 45.6867 | 10 | 4.8 | 3.6 | 4.6 |
| 5 | 2018-05-30 | 19:11:21 | -13.126 | 45.2157 | 10 | 4.7 | 3.8 | 4.7 |
| 6 | 2018-05-28 | 22:12:35 | -12.7924 | 45.6448 | 10 | 4.7 | 3.7 | 4.6 |
| 7 | 2018-05-28 | 17:09:27 | -12.8679 | 45.5989 | 10 | 4.7 | 3.8 | 4.7 |
| 8 | 2018-05-28 | 13:55:16 | -12.8749 | 45.7628 | 10 | 4.9 | 4.0 | 4.8 |
| 9 | 2018-05-27 | 14:23:27 | -12.8871 | 45.6632 | 13.16 | 4.7 | 3.9 | 4.7 |
| 10 | 2018-05-26 | 00:32:40 | -12.8048 | 45.6915 | 10 | 5.0 | 4.1 | 4.8 |
| 11 | 2018-05-25 | 09:32:46 | -12.8542 | 45.6124 | 10 | 5.2 | 4.4 | 5 |
| 12 | 2018-05-25 | 06:36:04 | -12.8192 | 45.5905 | 10 | 5 | 4.2 | 4.9 |
| 13 | 2018-05-22 | 12:37:08 | -12.852 | 45.6146 | 10 | 5.1 | 4.3 | 4.9 |
| 14 | 2018-05-21 | 00:47:14 | -12.8495 | 45.6536 | 10 | 5.5 | 5.1 | 5.4 |
| 15 | 2018-05-20 | 08:01:27 | -12.7977 | 45.6684 | 10 | 5.3 | 5.0 | 5.3 |
| 16 | 2018-05-19 | 21:00:01 | -12.8377 | 45.6371 | 10 | 4.9 | 4.1 | 4.8 |
| 17 | 2018-05-19 | 05:17:01 | -12.9013 | 45.7547 | 10 | 4.7 | 3.9 | 4.7 |
| 18 | 2018-05-15 | 20:25:17 | -12.8801 | 45.5793 | 10 | 4.7 | 3.8 | 4.7 |
| 19 | 2018-05-15 | 15:48:09 | -12.7763 | 45.581 | 17 | 5.8 | 5.6 | 5.7 |
| 20 | 2018-05-15 | 11:26:50 | -12.8377 | 45.6379 | 10 | 4.8 | 3.9 | 4.7 |
| 21 | 2018-05-15 | 08:58:18 | -12.8584 | 45.6601 | 15 | 4.6 | 4.6 | 5.1 |
| 22 | 2018-05-14 | 14:41:42 | -12.8307 | 45.6127 | 10 | 5.1 | 4.5 | 5.1 |
| 23 | 2018-05-14 | 04:12:02 | -12.8283 | 45.6282 | 10 | 4.5 | 3.9 | 4.7 |
| 24 | 2018-05-13 | 04:28:02 | -12.9418 | 45.408 | 10 | 4.6 | 3.8 | 4.7 |
